# Supplementary material for: Experiences with Glofitamab Administration following CAR T Therapy in Patients with Relapsed Mantle Cell Lymphoma
Source: MDPI journal article supplement (doi:10.3390/cells11172747), 2022-09-02
Supplement: s1 [file s1]

Online supplement to:

# **Experiences with glofitamab administration following CAR T therapy in patients with relapsed mantle cell lymphoma.**

<sup>1</sup>Alexander D. Heini, <sup>2</sup>Ulrike Bacher, <sup>2</sup>Naomi Porret, <sup>2</sup>Gertrud Wiedemann, <sup>2</sup>Myriam Legros, <sup>2</sup>Denise Stalder Zeerleder, <sup>1</sup>Katja Seipel, <sup>1</sup>Urban Novak, <sup>2</sup>Michael Daskalakis, and <sup>1</sup>Thomas Pabst

<sup>1</sup>Department of Medical Oncology, Inselspital, Bern University Hospital

<sup>2</sup>Department of Hematology and Central Hematology Laboratory, Inselspital, Bern University Hospital, Bern, Switzerland

\*Correspondence: Thomas Pabst, MD; Extraordinary Professor; Department of Medical Oncology; University Hospital and University of Bern; and Center for Hemato-Oncology; University Cancer Center; 3010 Berne; Switzerland. E-Mail: [thomas.pabst@insel.ch](mailto:thomas.pabst@insel.ch)

Contains two supplemental tables and one supplemental figure.

|                                                |      |      |      |       |      |      |      |      |      |            |      |      |      |      |      |      |      |
|------------------------------------------------|------|------|------|-------|------|------|------|------|------|------------|------|------|------|------|------|------|------|
| Pre/Post CAR T (days)                          | -50  | -40  | -6   | CAR T | 6    | 15   | 36   | 43   | 115  | Glofitamab | 169  | 188  | 209  | 223  | 237  | 258  | 296  |
| Pre/Post Glofitamab (days)                     | -212 | -202 | -168 |       | -156 | -147 | -126 | -119 | -47  |            | 7    | 26   | 47   | 61   | 75   | 96   | 134  |
|                                                |      |      |      |       |      |      |      |      |      |            |      |      |      |      |      |      |      |
| Leukocytes (10 <sup>9</sup> /L)                | 1.73 | 2.76 | 40.3 |       | 0.25 | 1.71 | 2.37 | 4.5  | 2.42 |            | 0.68 | 2.84 | 2.38 | 6.4  | 2.34 | 1.48 | 1.22 |
| Absolute Lymphocyte count (10 <sup>9</sup> /L) | 0.14 | 0.22 | 0.19 |       | 0.03 | 0.05 | 0.11 | 0.14 | 0.17 |            | 0.2  | 0.25 | 0.22 | 0.18 | 0.25 | 0.18 | 0.08 |
| B Cells (% of Lymphocytes)                     | 0    | 0    | 0    |       | 0    | 0    | 0.1  | 0    | 0    |            | 0    | 0    | 0.1  | 0    | 0    | 0    | 0    |
| T Cells (% of Lymphocytes)                     | 81   | 84   | 58   |       | 75   | 83   | 29   | 21   | 28   |            | 40   | 32   | 18   | 24   | 43   | 42   | 34   |
| CD4+ T cells (% of Lymphocytes)                | 51   | 49   | 34   |       | 37   | 42   | 20   | 15   | 19   |            | 31   | 27   | 15   | 14   | 27   | 31   | 27   |
| CD8+ T cells (% of Lymphocytes)                | 20   | 24   | 22   |       | 38   | 41   | 7    | 8    | 7    |            | 8    | 7    | 3    | 8    | 15   | 14   | 9    |
| CD4/CD8 Ratio                                  | 2.55 | 2.04 | 1.55 |       | 0.97 | 1.02 | 2.86 | 1.88 | 2.71 |            | 3.88 | 3.86 | 5    | 1.75 | 1.8  | 2.21 | 3    |
| NK cells (% of Lymphocytes)                    | 18   | 13   | 30   |       | 18   | 17   | 53   | 63   | 58   |            | 55   | 54   | 52   | 61   | 39   | 35   | 42   |

**Table S1:** Flow cytometric assessments of lymphocyte subsets of patient #1. Percentages not adding up to 100% are due to rounding or NK/T cells, which are not reported reliably.

|                                                |      |      |      |       |      |      |      |      |      |      |      |      |      |
|------------------------------------------------|------|------|------|-------|------|------|------|------|------|------|------|------|------|
| Pre/Post CAR T (days)                          | -105 | -41  | -6   | CAR T | 5    | 12   | 26   | 40   | 58   | 96   | 117  | 159  | 183  |
| Pre/Post Glofitamab (days)                     | -295 | -231 | -196 |       | -185 | -178 | -164 | -150 | -132 | -94  | -73  | -31  | -7   |
|                                                |      |      |      |       |      |      |      |      |      |      |      |      |      |
| Leukocytes (10 <sup>9</sup> /L)                | 5.69 | 4.2  | 7.97 |       | 8.69 | 9.41 | 4.39 | 2.6  | 2.69 | 3.04 | 2.98 | 2.75 | 4.28 |
| Absolute Lymphocyte count (10 <sup>9</sup> /L) | 2    | 0.37 | 0.36 |       | 0.09 | 0.2  | 0.35 | 0.19 | 0.25 | 0.24 | 0.25 | 0.19 | 0.15 |
| B Cells (% of Lymphocytes)                     | 68   | 0    | 0    |       | 0    | 0.3  | 0    | 0    | 0    | 0    | 0    | 0    | 0    |
| T Cells (% of Lymphocytes)                     | 18   | 74   | 69   |       | 59   | 46   | 57   | 55   | 49   | 50   | 48   | 40   | 51   |
| CD4+ T cells (% of Lymphocytes)                | 14   | 23   | 29   |       | 17   | 16   | 25   | 31   | 30   | 32   | 31   | 24   | 35   |
| CD8+ T cells (% of Lymphocytes)                | 5    | 51   | 43   |       | 44   | 31   | 34   | 26   | 22   | 20   | 18   | 15   | 16   |
| CD4/CD8 Ratio                                  | 2.8  | 0.45 | 0.67 |       | 0.39 | 0.52 | 0.74 | 1.19 | 1.36 | 1.6  | 1.72 | 1.6  | 2.19 |
| NK cells (% of Lymphocytes)                    | 14   | 25   | 31   |       | 42   | 51   | 44   | 46   | 53   | 51   | 50   | 58   | 46   |

**Table S2:** Flow cytometric assessments of lymphocyte subsets of patient #2. Due to the patient declining further active treatment, no further flow cytometric assessments were made. Percentages not adding up to 100% are due to rounding or NK/T cells, which are not reported reliably.

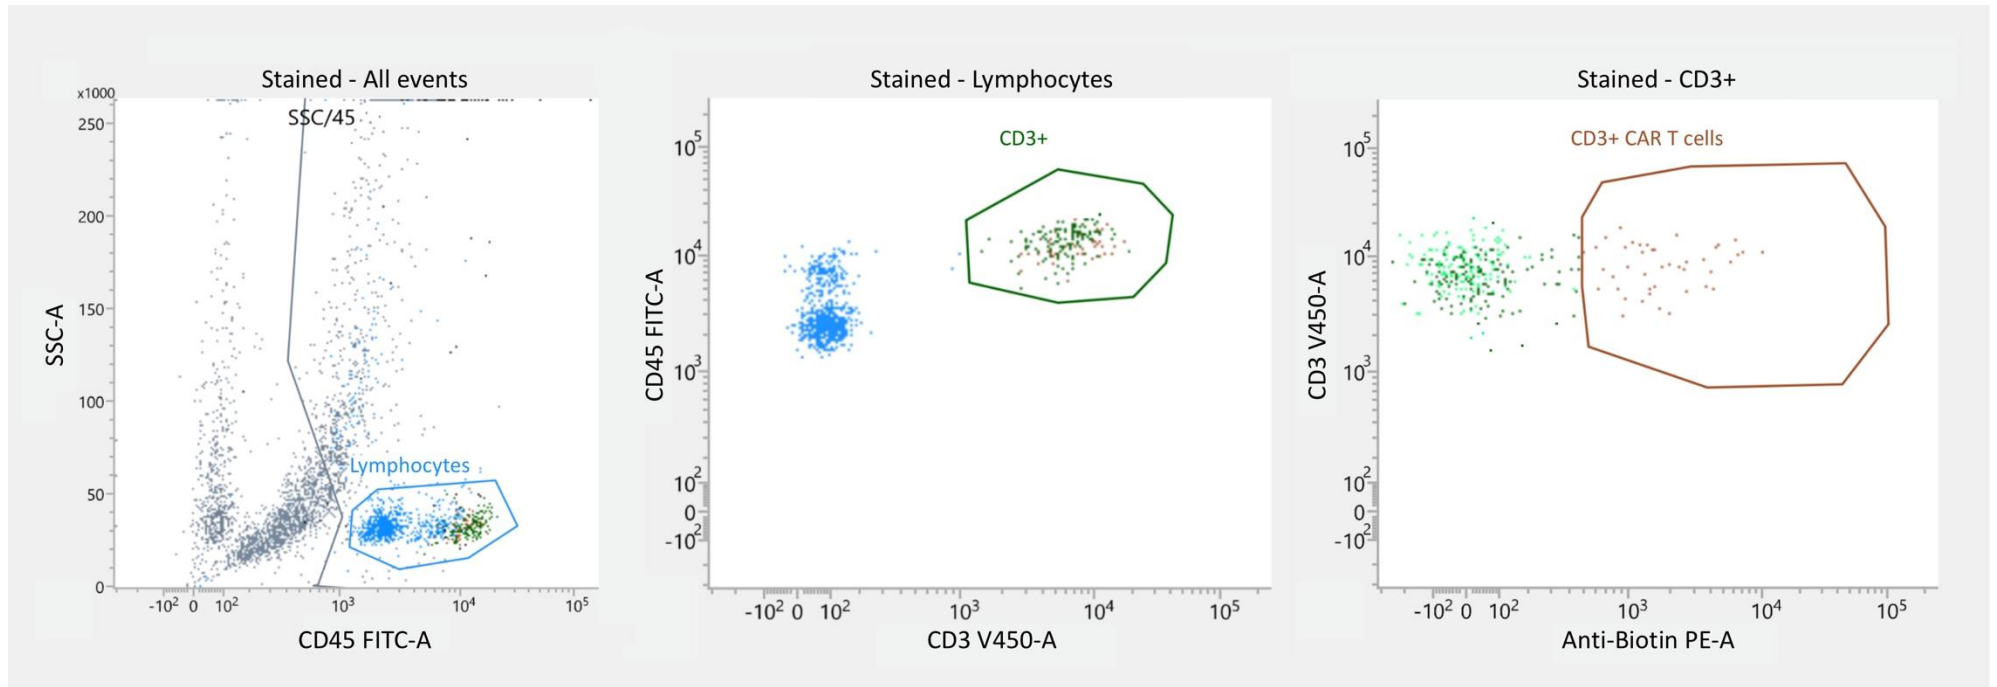

**Figure S1:** Flow cytometric detection of CAR T cells in cerebrospinal fluid of patient #1 during relapse. The left panel shows a bivariate plot of CD45 against side scatter (SSC) allowing the isolation of lymphocytes (blue gate). The middle panel shows a plot of CD3 against CD45 for the isolation of CD3+ lymphocytes (green gate). The right panel shows the detection of CAR T cells using the CD19 CAR Detection Reagent (Biotin), that detects CD19 CAR T cells via recognition of the CD19 CAR molecule, and that can be identified with flexible Anti-Biotin fluochromes.
